# Supplementary material for: The paleobiology and paleoecology of South African Lystrosaurus
Source: PeerJ. 2020 Nov 24;8:e10408. doi: 10.7717/peerj.10408 (PMC7694564; doi:10.7717/peerj.10408)
Supplement: Supplemental Information 1 — Cranial measurements, primary osteon diameter, vascularization, dominant bone tissue type and growth mark count of the four South African Lystrosaurus species. Abbreviations: pod, primary osteon diameter; vasc, vascularization. [file peerj-08-10408-s001.xls]

## Sheet: Allometries
Taxon	Accession Number	Element	Total Length	Midshaft Width	Proximal Width	Distal Width	Comments		Taxon															Counts:	Taxon	BSL	%adult	humerus	radius	ulna	femur	tibia	fibula
Dicynodon	SAM-PK-5576a	femur									BSL	Humerus Length	Humerus Midshaft	Radius Length	Ulna Length	Femur Length	Tibia Length	Fibula Length							L. maccaigi	0	0	0	0	0	0	#VALUE!	#VALUE!
Dicynodon	SAM-PK-5576b	tibia		16.45					L. maccaigi																L. curvatus	0	0	0	0	0	0	#VALUE!	#VALUE!
Dicynodon	NMQR 3665b	ulna		35.74	73.57				NMQR 3658		102	71.2	16.43	43.3											L. murrayi	0	0	0	0	0	0	#VALUE!	#VALUE!
Dicynodon	NMQR 3633a	humerus	209.43	38.62	113.51	114.15			NMQR 3922c			174.71	32.95												L. declivis	0	0	0	0	0	0	#VALUE!	#VALUE!
Dicynodon	SAM-PK-5146a	femur							NMQR 3663		319	209.8	40.35
Dicynodon	SAM-PK-5146b	tibia		38					NMQR 3699		269					176
Dicynodon	SAM-PK-5146d	fibula		38					NMQR 1020		314					210.77
L. maccaigi	NMQR 3658a	humerus	71.2	16.43	34.1	46.35			NMQR 3641		160						18.5
L. maccaigi	NMQR 3658b	radius	43.3	8.28	18.95	22.58			NMQR 796								125.71	112.35
L. maccaigi	NMQR 3641	tibia		15	34.97				SAM-PK-K10571		190						133
L. maccaigi	NMQR 3689	tibia		19.64					NMQR 603								133
L. maccaigi	NMQR 3689	femur				73.08
L. maccaigi	NMQR 796	femur
L. maccaigi	NMQR 796a	tibia	125.71	21.58	38.72	34.3			L. curvatus
L. maccaigi	NMQR 796b	fibula	112.35	12.78	33.04	24.09			NMQR 4001		74.5	84.18
L. maccaigi	SAM-PK-K10571a	tibia	133	24	44	33			NMQR 3922			119.87	28.97			132.28
L. maccaigi	SAM-PK-K10571b	rib							NMQR 3651		174		27.29	83	101.4
L. maccaigi	NMQR 603	tibia	133	24
L. maccaigi	NMQR 3648	humerus		27.52	82.05	91.38
L. maccaigi	NMQR 3922c	humerus	174.71	32.95	>89.94	>88.21	d/v compressed
L. maccaigi	NMQR 3699a	femur
L. maccaigi	NMQR 3699b	femur	176	31.79					L. murrayi
L. maccaigi	NMQR 3699e	rib		19.59					NMQR 3636		33.16						14.56	20.28
L. maccaigi	NMQR 3689	femur		28.36		73.09	63% using MS width, 67.1% using dist width		NMQR 3655		36.29					34.97		32.14
L. maccaigi	NMQR 3689	tibia		19.64					NMQR 3635		46.33					27.93	19.46	19.46
L. maccaigi	NMQR 1020	femur	210.77	38		88.11	MS width total = 45, distal width total = 108		NMQR 3531		49	25.85
L. maccaigi	NMQR 3663a	humerus	209.8	40.35	117.42	102.79			NMQR 3629		65.4	44.7	8.61	30	30.8
L. maccaigi	NMQR 3663b	ulna		41.33		81.2			NMQR 3927		85.4	92.73	17.26	57.06	68.2
L. curvatus	NMQR 4001	humerus	84.18		48.57				BP/1/4798		101				75.21
L. curvatus	NMQR 3651a	humerus		27.29		76.79			NMQR 3581		99.92					103.1
L. curvatus	NMQR 3651b	radius	83	17.61	41.82	50.29			NMQR 3765		109.41	94.45	17.58		72.57	103.2		88.33
L. curvatus	NMQR 3651c	ulna	101.4	20.1					BP/1/269		110.65	78.71	12.31	55.47	54.57
L. curvatus	NMQR 3922a	humerus	119.87	28.97	67.92	71.62	dorso-ventrally compressed		SAM-PK-8991			101.88		68.02	78.6		75.48
L. curvatus	NMQR 39222b	femur	132.38	28.97	53.78	58.31	dorso-ventrally compressed		NMQR 3963		145	121.84	19.39
L. declivis	BP/1/1750	tibia	81.95	13.34	30.02	22.29			NMQR 659a				20.11
L. declivis	NMQR 3959a	tibia	87.1	13.28	30.9	24.57			SAM-PK-8		146	99
L. declivis	NMQR 3959b	fibula		9.58	17.25				BP/1/3236		213		31.31	106.9	118.65
L. declivis	NMQR 3915	radius	31.9
L. declivis	NMQR 4039a	humerus	86.47	15.74		49.06
L. declivis	NMQR 4039b	femur		16.16					L. declivis
L. declivis	NMQR 735a	humerus	101.4	18.07	50.74	57.17			BP/1/1750		115.17						81.95
L. declivis	NMQR 735b	tibia	65.2	13.44	32.26				NMQR 3959		99						87.1
L. declivis	NMQR 735c	radius		11.07	29.95				NMQR 3915					31.9
L. declivis	NMQR 735d	ulna	76.53	13.71	32.78				NMQR 4039		74.05	86.47
L. declivis	NMQR 735e	femur			43.69				NMQR 3738		111.53			69.99	92.39
L. declivis	NMQR 164	humerus		17.75		58.31			NMQR 735		133.76	101.4			76.53		65.2
L. declivis	NMQR 164	radius		12.15		27.67			BP/1/4211		136	100		55	64
L. declivis	NMQR 164	ulna	74.7	13.65	30.88				SAM-PK-11184a		138	89.5		54.6	67.5	115.1
L. declivis	NMQR 164	humerus	100		45	58			SAM-PK-K8013a			135.7		84	117.9
L. declivis	BP/1/4211a	radius	55	10	27	21			NMQR 3181		173	147.24
L. declivis	BP/1/4211b	ulna	64	11	28	18			NMQR 1485		185	163.49
L. declivis	SAM-PK-11184a	humerus	89.5
L. declivis	SAM-PK-11184a	radius	54.6
L. declivis	SAM-PK-11184a	ulna	67.5
L. declivis	SAM-PK-11184a	femur	115.1
L. declivis	SAM-PK-11184a	rib
L. declivis	NMQR 3738a	radius	69.99	14.46	34.21	22.56
L. declivis	NMQR 3738b	ulna	92.39	14.05	32.88	26.65
L. declivis	SAM-PK-K8013a	humerus	135.7
L. declivis	SAM-PK-K8013	radius	84
L. declivis	SAM-PK-K8013	ulna	117.9
L. declivis	SAM-PK-K8013b	rib
L. declivis	NMQR 3181	humerus	147.24	24.21	78.48	86.66
L. declivis	NMQR 1485	humerus	163.49	28.28	75.34	98.94
L. murrayi	NMQR 3636	tibia	14.56
L. murrayi	NMQR 3636	fibula	20.28
L. murrayi	NMQR 3655	femur	34.97
L. murrayi	NMQR 3655	fibula	32.14
L. murrayi	NMQR 3635	femur	27.93	5.37	13.27	8.51
L. murrayi	NMQR 3635a	tibia	19.46		9.48	3.78
L. murrayi	NMQR 3635b	fibula	19.46
L. murrayi	SAM-PK-3531	humerus	25.85
L. murrayi	NMQR 3629a	humerus	44.7	8.61		24.36
L. murrayi	NMQR 3629b	radius	30	4.86	10.17	13.29
L. murrayi	NMQR 3629c	ulna	30.8	8.32	10.79	8.32
L. murrayi	NMQR 3927a	humerus	92.73	17.26	43.33	53.67
L. murrayi	NMQR 3927b	radius	57.06	10.15	21.84	27.31
L. murrayi	NMQR 3927c	ulna	68.2	10.11	27.8
L. murrayi	BP/1/4798	ulna	75.21	13.56	33.41	15.76
L. murrayi	NMQR 3581	femur	103.1	13.88	31.97	34.59
L. murrayi	BP/1/4217	ulna	71.74	10.73
L. murrayi	BP/1/4217	humerus		14.6
L. murrayi	NMQR 3765	humerus		17.58		57.4
L. murrayi	NMQR 3765	radius		11.07
L. murrayi	NMQR 3765	ulna	71.27	12.97	24.75	20.87
L. murrayi	NMQR 3765	femur (l)	103.19	16.47
L. murrayi	NMQR 3765	femur ®		16.53		39.67
L. murrayi	NMQR 3765	tibia	88.94	12.94	33.43
L. murrayi	BP/1/269	humerus	78.71	12.31	32.8	43.27
L. murrayi	BP/1/269	radius	55.47	8.5		19.93
L. murrayi	BP/1/269	ulna	54.57	6.53		15.24
L. murrayi	NMQR 3840a	humerus		14.03		47.16
L. murrayi	NMQR 3840b	humerus			56.04
L. murrayi	SAM-PK-8991a	humerus	101.88
L. murrayi	SAM-PK-8991b	radius	68.02
L. murrayi	SAM-PK-8991c	ulna	69.12
L. murrayi	SAM-PK-8991d	tibia	75.48
L. murrayi	BP/1/5070	humerus
L. murrayi	NMQR 835a	femur			65.56	56.73
L. murrayi	NMQR 835b	tibia		17.66	42.52
L. murrayi	NMQR 835c	fibula		11.06	21.44
L. murrayi	NMQR 3765	ulna	72.57
L. murrayi	NMQR 3765	fibula	88.33
L. murrayi	SAM-PK-8	humerus	99
L. murrayi	NMQR 3963	humerus	121.84	19.39		71.16
L. murrayi	NMQR 659a	humerus		20.11		65.32
L. murrayi	NMQR 659b	radius		11.59
L. murrayi	NMQR 659c	ulna		18.67	29.13
L. murrayi	BP/1/3236	humerus			95.63	101.3
L. murrayi	BP/1/3236	humerus	>132.18	31.31		107.41
L. murrayi	BP/1/3236	radius	106.9	18.53		59.06
L. murrayi	BP/1/3236	ulna	118.65	21.35	62.17	29.42
Kannemeyeria	NMQR 2674a	ulna		24.59
Kannemeyeria	BP/1/4523	fibula	150.06	20.34	49.63
Kannemeyeria	BP/1/3896c	radius		29.06
Kannemeyeria	BP/1/3896d	ulna		42.68
Kannemeyeria	BP/1/3896e	tibia		30.59
Kannemeyeria	BP/1/1669	humerus

## Sheet: Table 1
Biozone	Max_age	Min_age	Taxon	Specimen_no	Element	% Max Size	pod_1	pod_2	pod_3	pod_4	pod_5	pod_6	pod_7	pod_8	pod_9	pod_10	pod_11	pod_12	pod_13	pod_14	pod_15	Avg_pod	stdev_pod	%_vasc_1	%_vasc_2	%_vasc_3	%_vasc_4	%_vasc_5	%_vasc_6	%_vasc_7	%_vasc_8	%_vasc_9	%_vasc_10	Avg_%_vasc	stdev_%_vasc	Dominant Bone Tissue	Growth Marks	Observed No. of Growth Marks	Ontogenetic Stage	Comment
DAZ	255	252	L. maccaigi	NMQR 3658a	humerus	26	91	89	103	77	97	84	107	82	81	85	93	101	91	99	74	90	9.8232	24.0728	12.9624	15.1604	29.3524	25.0323	16.6543	20.6241	22.2452	21.302	15.9656	20.34	5.11848	fibrolamellar	absent	0	juvenile
DAZ	255	252	L. maccaigi	NMQR 3658b	radius	26	109	139	88	97	90	67	63	95	80	81	111	85	55	104	88	90	20.9927	7.69	6.17	4.97	3.88	3.75	6.45	9.07	11.35	11.14	9	7.35	2.76944	fibrolamellar	absent	0	juvenile
LAZ	252	251	L. maccaigi	NMQR 3641	tibia	36	88	70	81	59	101	74	74	65	86	78	47	39	69	56	49	69	16.943	19.4	10.25	8.92	13.19	16.99	9.37	10.65	8.95	13.77	15.41	12.69	3.67676	fibrolamellar	absent	0	juvenile
LAZ	252	251	L. maccaigi	NMQR 4095	femur	44	78	124	124	57	62	107	91	83	83	87	75	67	62	82	107	85.9333	21.3289	7.71	9.22	11.6	9.97	10.24	15.44	16.75	13.64	9.36	8.13	12.1263	3.0955	fibrolamellar	present	2	early subadult
DAZ	255	252	L. maccaigi	NMQR 796a	tibia	47	82.19	83	84	112	73	85	94	119	86	73	120	87	76	82	67	88.2127	16.3796	11.3803	27.048	17.8996	18.6496	13.9449	13.109	11.5045	12.2335	10.0513	8.48538	14.4306	5.45927	fibrolamellar	present	1	early subadult
DAZ	255	252	L. maccaigi	NMQR 796b	fibula	47	85.23	62	67	55	53	43	60	54	70	49	73	69	77	48	57	61.482	11.8581	17.278	15.9706	17.239	10.8739	14.7033	15.8777	4.93084	7.28824	8.04212	10.1072	12.2311	4.54081	fibrolamellar	present	1	early subadult
LAZ	252	251	L. maccaigi	NMQR 3648	humerus	49	75.17	94	82	84	83	61	64	80	88	82	74	65	61	82	55	75.3447	11.524	11.3803	27.048	17.8996	18.6496	13.9449	13.109	11.5045	12.2335	10.0513	8.48538	14.4306	5.45927	fibrolamellar	present	2	early subadult
DAZ	255	252	L. maccaigi	SAM-PK-K10571a	tibia	49	80	67	77	60	57	68	68	71	87	73	78	58	89	50	53	69	11.8892	5.1	9.05	5.89	7.36	1.86	4.25	2.87	12.7	8.67	10.72	6.85	3.48164	fibrolamellar	present	1	early subadult
DAZ	255	252	L. maccaigi	SAM-PK-K10571b	rib	49	84	59	128	95	104	112	65	88	72	116	72	84	97	113	83	91	20.2303	7.25088	5.98456	4.74961	7.00888	7.89341	11.6194	10.6048	4.01287	2.95795	4.51103	6.66	2.82027	fibrolamellar	present	3	early subadult
LAZ	252	251	L. maccaigi	NMQR 3689a	humerus	65	101	108	104	86	92	111	93	85	86	57	81	78	69	64	69	86	16.3305	32.39	22.26	17.6	29.21	29.25	19.81	21.56	14.11	13.6	15.69	21.548	6.72889	fibrolamellar	absent	0	late subadult
LAZ	252	251	L. maccaigi	NMQR 3689b	femur	65	66	69	67	68	61	45	53	66	68	58	54	65	56	49	63	61	7.61452	19.06	14.42	11.57	11.39	12.24	14.25	15.03	12.15	14.31	11.07	13.549	2.42183	fibrolamellar	present	3	late subadult
LAZ	252	251	L. maccaigi	NMQR 3689c	tibia	65	67	69	99	78	114	77	108	86	82	69	83	79	74	63	62	81	15.6235	13.79	13.14	12.23	9.37	12.12	13.64	15.51	20.75	8.42	8.71	12.768	3.66367	fibrolamellar	present	3	late subadult
DAZ	255	252	L. maccaigi	NMQR 3922c	humerus	68	115	103	104	83	53	51	90	99	95	88	55	69	75	62	89	82.0667	20.3029	12.11	11.94	12.2	23.47	20.24	17.47	11.89	13.64	15.47	6.12	14.455	4.92704	fibrolamellar	present	2	late subadult
DAZ	255	252	L. maccaigi	NMQR 3699a	femur	69	89.69	74	54	72	72	55	59	61	55	75	99	75	61	57	53	67.446	13.7629	5.38958	5.39	4.89	5.1	6.5	8.04	13.97	10.64	7.63	7.76	7.53096	2.87837	fibrolamellar	present	4	late subadult
DAZ	255	252	L. maccaigi	NMQR 3699b	femur	69	81.17	82	72	85	97	54	70	62	45	60	74	98	59	64	72	71.678	15.0962	6.43655	10.0528	6.22616	13.1162	10.5416	11.8183	6.36417	2.27912	2.63897	3.0887	7.25625	3.94057	fibrolamellar	present	2	late subadult
DAZ	255	252	L. maccaigi	NMQR 3699c	humerus	69	76.71	71	84	82	45	97	103	56	78	77	66	70	133	67	59	77.6473	21.3404	12.4858	8.48158	13.3564	12.5848	16.325	34.5586	26.8154	24.1731	26.0581	18.072	19.2911	8.25277	fibrolamellar	present	1	late subadult
DAZ	255	252	L. maccaigi	NMQR 3663a	humerus	78	82	97	80	79	69	77	79	81	54	59	66	63	49	64	58	70.4667	12.9993	23.18	19.78	24.52	30.28	9	16.53	14.87	16.36	11.28	10.06	17.59	6.87544	fibrolamellar/parallel-fibered	present	7	late subadult	bone tissue transition observed
DAZ	255	252	L. maccaigi	NMQR 3663b	ulna	78	64	81	60	77	50	60	71	82	82	63	66	55	82	78	85	70	11.388	40.66	22.22	18.91	7.34	6.44	7.94	8.61	10.23	3.35	3.65	12.94	11.5139	fibrolamellar/parallel-fibered	present	8	late subadult	bone tissue transition observed
DAZ	255	252	L. maccaigi	NMQR 1020	femur	81	60	59	55	47	69	58	93	61	74	53	75	62	78	73	82	66.6	12.443	5.6084	17.74	11.51	10.13	9.29	9.45	12.65	10.03	15.72	14.92	11.7048	3.60834	fibrolamellar	present	4	adult
DAZ	255	252	L. maccaigi	NMQR 3940b	tibia	84	44	41	38	46	36	42	42	43	58	43	59	58	42	36	44	44.8	7.55173	5.62	3.48	5.99	8.19	4.95	7.86	7.55	9.14	7.76	7.67	6.821	1.74041	fibrolamellar/parallel-fibered	present	2	adult	bone tissue transition observed
DAZ	255	252	L. maccaigi	NMQR 3940d	radius	84	46	45	48	43	37	39	25	64	42	32	38	42	45	52	58	43.7333	9.65451	2.95	3.64	3.44	3.67	4.54	5.28	5.17	5.14	6.16	5.3	4.529	1.04405	fibrolamellar/parallel-fibered	present	3	adult	bone tissue transition observed
LAZ	252	251	L. curvatus	NMQR 4001	humerus	30	92	89	104	74	69	61	78	69	84	89	83	77	62	78	86	80	11.7149	28.9	26.82	21.04	14.62	18.36	18.15	16.06	33.81	16.92	13.04	20.8	6.83186	fibrolamellar	absent	0	juvenile
DAZ	255	252	L. curvatus	NMQR 3651a	humerus	71	63	63	54	59	68	60	67	81	51	88	123	99	46	62	64	70	20.2127	16.64	16.22	15.81	11.28	5.98	12.8	7.1	8.17	13.89	9.77	11.77	3.91478	fibrolamellar	present	2	late subadult
DAZ	255	252	L. curvatus	NMQR 3651b	radius	71	61	44	67	63	80	74	39	62	91	69	61	78	72	71	103	69	16.0846	9.14	8.62	9.08	6.08	9.64	5.41	8.65	11.96	16.25	9.1	9.39	3.01674	fibrolamellar	present	2	late subadult
DAZ	255	252	L. curvatus	NMQR 3651c	ulna	71	97	121	106	105	102	117	61	89	111	80	64	71	65	55	55	87	23.4301	23.8	24.85	23.23	6.84	7.87	4.82	5.5	8.62	13.39	18.67	13.76	8.12995	fibrolamellar	present	3	late subadult
DAZ	255	252	L. curvatus	NMQR 3922a	humerus	75	95.18	114	116	68	89	113	108	115	80	79	60	74	59	58	61	85.9453	22.6751	9.98	9.57	7.41	12.27	11.37	16.63	15.26	15.73	15.45	24.02	13.769	4.74447	fibrolamellar	present	2	late subadult
DAZ	255	252	L. curvatus	NMQR 3922b	femur	75	83.13	70	66	86	59	65	89	72	72	59	82	63	66	66	85	72.2087	10.2023	8.48	6.03	6.01	4.69	5.64	6.53	6.83	6.78	9.23	9.45	6.967	1.58324	fibrolamellar	present	1	late subadult
LAZ	252	247.2	L. murrayi	NMQR 3635a	radius	22	56	82	81	69	71	95	85	90	67	79	89	67	91	72	75	78	11.016	33.83	32.92	30.9	13.59	17.91	39	38.24	–	–	–	29.48	9.88684	fibrolamellar	absent	0	juvenile
LAZ	252	247.2	L. murrayi	NMQR 3635b	ulna	22	93	132	115	117	104	87	92	76	99	94	94	103	61	83	78	95	17.8133	33.49	44.6	68.32	58.26	80.2	36.65	55.68	–	–	–	53.88	16.9432	fibrolamellar	absent	0	juvenile
LAZ	252	247.2	L. murrayi	SAM-PK-3531	humerus	23	92	92	118	97	89	114	73	99	86	103	96	94	103	100	70	95	12.8423	32.7374	40.9384	35.1773	36.1205	50.3748	48.6758	36.6012	–	–	–	40.09	6.90817	fibrolamellar	absent	0	juvenile
LAZ	252	247.2	L. murrayi	NMQR 3629a	humerus	31	77	109	128	110	103	108	87	95	123	90	92	71	92	75	51	94	20.4537	25.72	24.09	24.8	22.67	26.09	23.68	25.66	25.38	20.06	30.07	24.822	2.58452	fibrolamellar	absent	0	juvenile
LAZ	252	247.2	L. murrayi	NMQR 3629b	radius	31	121	88	123	97	104	108	85	77	105	82	91	100	65	94	106	96	15.7879	19.72	18.03	14.89	14.36	11.25	5.84	6.69	14.66	19.58		13.89	5.11041	fibrolamellar	absent	0	juvenile
LAZ	252	247.2	L. murrayi	NMQR 3629c	ulna	31	93	72	75	66	56	86	77	72	82	79	81	57	88	72	90	76	11.0441	11.39	16.46	18.06	17.9	21.16	27.88	20.51	–	–	–	19.1	5.03718	fibrolamellar	absent	0	juvenile
LAZ	252	247.2	L. murrayi	NMQR 3927a	humerus	40	75.38	67	65	46	72	59	51	80	82	54	59	77	81	84	80	68.8253	12.5107	12.07	11.45	10.27	15.84	18.96	15.75	18.31	13.22	19.28	20.83	15.598	3.70234	fibrolamellar	absent	0	early subadult
LAZ	252	247.2	L. murrayi	NMQR 3927b	radius	40	73.44	67	49	86	100	69	114	79	60	76	65	35	58	84	54	71.296	19.9869	12.17	14.93	19.23	11.31	14.15	14.19	13.6	30.49	17.85	15.34	16.326	5.51218	fibrolamellar	absent	0	early subadult
LAZ	252	247.2	L. murrayi	NMQR 3927c	ulna	40	91.2	50	68	60	73	89	68	40	47	60	45	87	59	86	69	66.1467	16.7454	24.12	15.21	16.31	17.07	19.3	14.03	12.86	11.59	7.79	6.78	14.506	5.18513	fibrolamellar	absent	0	early subadult
LAZ	252	247.2	L. murrayi	NMQR 3581	femur	47	65	69	46	59	100	72	90	67	81	57	73	75	67	77	59	70	13.4582	13.65	18.62	21.58	27.84	23.91	18.56	23.27	26.92	27.35	19.59	22.13	4.60669	fibrolamellar	absent	0	early subadult
LAZ	252	247.2	L. murrayi	NMQR 3840a	humerus	57	63	72	98	71	78	87	67	58	65	59	63	60	97	62	85	72	13.5629	11.94	10.58	12.93	15.1	14.62	13.19	13.65	16.36	10.97	8.47	12.781	2.35536	fibrolamellar	absent	0	early subadult
LAZ	252	247.2	L. murrayi	NMQR 3840b	humerus	57	116	95	119	75	139	79	72	143	65	85	139	103	65	85	102	99	27.0903	10.98	14.87	15.06	13.79	12.52	13.3	12.14	11.86	10.86	8.75	12.413	1.94368	fibrolamellar	absent	0	early subadult
LAZ	252	247.2	L. murrayi	NMQR 3960	radius	61	65.05	52.24	53.62	56.78	75.81	65.63	105.52	78.97	111.65	77.76	36.65	63.19	109.63	66.07	57.37	71.7293	22.091	8.93	8.62	13.16	9.33	12.4	11.49	12.02	9.09	10.63	9.18	10.485	1.66965	fibrolamellar	present	1	late subadult
LAZ	252	247.2	L. murrayi	SAM-PK-8991a	humerus	63	127	78	78	80	68	71	80	96	101	96	101	70	118	65	85	88	18.4461	28.7228	27.2206	31.5196	26.4189	20.6682	36.3612	42.3048	36.6212	38.9173	27.2069	31.6	6.74229	fibrolamellar	present	2	late subadult
LAZ	252	247.2	L. murrayi	SAM-PK-8991b	radius	63	107	99	97	109	108	83	99	86	53	65	69	113	112	109	93	93	18.6849	16.3288	16.662	24.3823	24.9699	23.2896	13.1493	15.5728	8.48998	14.4551	12.935	17.02	5.4815	fibrolamellar	present	1	late subadult
LAZ	252	247.2	L. murrayi	SAM-PK-8991c	ulna	63	77	77	70	82	69	91	81	96	68	91	59	96	118	102	64	83	16.1576	9.99449	12.4488	13.9183	11.1994	11.4389	8.5569	9.95033	14.337	17.1927	8.2307	11.73	2.80479	fibrolamellar	present	1	late subadult
LAZ	252	247.2	L. murrayi	SAM-PK-8991d	tibia	63	110	110	111	81	120	104	70	150	77	69	82	82	87	130	115	100	23.7994	14.9982	13.7401	13.8158	15.5605	18.4265	21.5379	21.689	14.7589	15.6874	16.971	16.72	2.93283	fibrolamellar	present	1	late subadult
LAZ	252	247.2	L. murrayi	BP/1/5070	humerus	63	127	126	108	88	113	86	114	85	106	65	95	72	90	98	111	99	18.2775	19.9383	23.1193	23.5186	27.323	28.3434	17.1166	18.2533	18.1423	23.5487	19.5192	21.88	3.90957	fibrolamellar	absent	0	late subadult
LAZ	252	247.2	L. murrayi	NMQR 659a	humerus	64	107.02	97	61	124	86	77	73	94	97	73	78	89	67	67	83	84.868	16.9466	9.35	12.52	15.04	12.72	14.12	19.44	24.32	27.25	20.3	13.76	16.882	5.72416	fibrolamellar	absent	0	late subadult
LAZ	252	247.2	L. murrayi	NMQR 659b	radius	64	37.11	57	62	78	61	46	31	56	58	54	51	66	57	75	64	56.874	12.4653	14.26	11.82	7.94	10.09	10.44	6.7	8.33	7.9	8.55	10.7	9.673	2.24889	fibrolamellar	absent	0	late subadult
LAZ	252	247.2	L. murrayi	NMQR 659c	ulna	64	105.11	79	88	95	106	79	88	72	70	56	86	89	68	92	60	82.2073	14.9605	12.85	15.66	10.16	12.33	10.34	8.96	13.88	11.74	11.08	13.68	12.068	2.02304	fibrolamellar	absent	0	late subadult
LAZ	252	247.2	L. murrayi	NMQR 835a	femur	66	45	101	138	99	108	99	102	85	93	100	83	86	63	80	112	93	21.4858	15.86	23.99	20.52	10.8	29.88	20.36	21.29	24.07	26.73	23.46	21.7	5.40004	fibrolamellar	absent	0	late subadult
LAZ	252	247.2	L. murrayi	NMQR 835b	tibia	66	72	118	52	76	75	58	67	94	74	92	66	77	67	83	74	76	15.9896	14.8	14.01	14.42	19.01	19.74	19.78	15.99	19.53	12.94	15.04	16.53	2.6918	fibrolamellar	absent	0	late subadult
LAZ	252	247.2	L. murrayi	NMQR 835c	fibula	66	75	81	92	84	61	70	79	63	47	69	111	66	61	83	66	74	15.3663	10.83	23.31	21.41	7.32	7.42	7.12	6.58	6.16	9.86	24.07	12.41	7.42824	fibrolamellar	absent	0	late subadult
LAZ	252	247.2	L. murrayi	NMQR 3963	humerus	68	64	48	73	56	57	71	69	118	78	62	47	85	76	66	46	68	18.1913	29.16	23.34	12.07	10.23	12.24	7.96	9.38	12.27	9.67	14.59	14.091	6.81444	fibrolamellar	present	1	late subadult
LAZ	252	247.2	L. murrayi	BP/1/3236	humerus	100	98	147	136	125	117	104	115	135	121	125	100	100	100	97	114	115	15.8331	22.42	21.08	22.06	22.49	15.24	24.82	22.82	10.77	18.75	22.97	20.34	4.29102	fibrolamellar	present	1	adult
LAZ	252	247.2	L. declivis	NMQR 3959a	tibia	44	78	97	65	113	75	104	98	82	67	91	121	110	92	127	75	93	19.3649	30.98	32.52	28.9	27.33	30.12	29.48	24.99	24.48	21.28	26.34	27.6	3.42113	fibrolamellar	absent	0	early subadult
LAZ	252	247.2	L. declivis	NMQR 3959b	fibula	44	59	78	90	79	67	63	89	68	56	53	88	81	85	80	92	75	13.154	6.79	13.87	14.59	13.91	13.35	11.5	13.85	13.16	10.33	15.34	12.7	2.52337	fibrolamellar	absent	0	early subadult
LAZ	252	247.2	L. declivis	NMQR 4039a	humerus	48	84	55	64	65	55	64	61	62	39	63	74	53	59	56	41	59.6667	11.2101	14.8	20.51	19.07	12.87	11.73	8.67	7.88	17.1	21.69	13.18	14.75	4.77041	fibrolamellar	present	1	early subadult
LAZ	252	247.2	L. declivis	NMQR 4039b	femur	48	80	100	88	79	43	66	50	45	101	57	57	57	58	50	53	65.6	19.2458	11.93	9.63	12.69	8.29	11	9.58	6.99	10.72	9.71	8.18	9.872	1.76414	fibrolamellar	present	1	early subadult
LAZ	252	247.2	L. declivis	NMQR 3738a	radius	49	75.14	58.68	59.18	75.73	58.72	53.63	60.24	35.85	57.58	74.88	45.91	34.84	80.83	84.87	71.93	61.8673	15.3665	25.07	27.9	28.93	25.81	27.68	25.81	23.2	26.66	18.46	11.81	24.133	5.2449	fibrolamellar	present	1	early subadult
LAZ	252	247.2	L. declivis	BP/1/4211a	radius	51	169	85	113	74	83	79	62	66	89	94	70	76	76	111	65	88	27.2026	–	–	–	–	–	–	–	–	–	–	–	–	fibrolamellar	present	1	early subadult
LAZ	252	247.2	L. declivis	BP/1/4211b	ulna	51	73	126	137	59	95	111	72	92	84	128	107	153	110	83	75	100	27.2021	14.57	9.97	11.37	13.33	10.1	9.08	13.92	4.78	5.83	4.18	9.71	3.76771	fibrolamellar	present	1	early subadult
LAZ	252	247.2	L. declivis	NMQR 735a	humerus	59	92	75	105	85	73	75	70	74	123	133	114	110	102	105	95	95	19.8559	27.5	28.07	17.61	24.58	28.72	24.8	18.77	18.79	11.63	27.29	22.78	5.73738	fibrolamellar	absent	0	early subadult
LAZ	252	247.2	L. declivis	NMQR 735b	tibia	59	65	78	86	87	104	60	55	80	72	79	87	83	67	56	93	77	14.1381	25.74	14.29	12.88	12.9	10.49	13.02	28.17	20.04	17.41	18.23	17.32	5.87294	fibrolamellar	present	1	early subadult
LAZ	252	247.2	L. declivis	NMQR 735c	radius	59	93	80	79	57	61	69	75	64	59	62	61	69	57	91	74	70	11.6953	11.55	8.18	7.81	14.21	18.12	19.43	13.94	13.73	14.43	10.1	13.15	3.84333	fibrolamellar	absent	0	early subadult
LAZ	252	247.2	L. declivis	NMQR 735d	ulna	59	99	88	73	114	103	96	96	93	101	103	113	108	124	141	95	103	15.8964	15.21	9.9	13.97	12.23	9.21	10.86	14.35	14	9	11.76	12.05	2.26784	fibrolamellar	absent	0	early subadult
LAZ	252	247.2	L. declivis	SAM-PK-11184a	humerus	61	64	70	68	75	65	55	72	65	62	68	94	114	87	64	100	75	16.4615	14.56	25.37	25.43	16.69	27.81	14.87	19.94	17.57	19.96	21.44	20.36	4.62893	fibrolamellar	present	0	late subadult
LAZ	252	247.2	L. declivis	SAM-PK-11184a	femur	61	126	127	87	140	104	135	73	88	124	100	175	108	107	100	82	112	26.5396	30.6376	26.3494	21.5938	22.9898	16.776	20.5104	20.3544	22.0278	24.2666	26.1741	23.17	3.88455	fibrolamellar	present	0	late subadult
LAZ	252	247.2	L. declivis	SAM-PK-11184a	rib	61	105	102	69	77	66	94	89	107	44	53	60	98	74	86	120	82.9333	21.93	7.02428	5.87218	9.7503	11.2547	7.37744	7.92632	4.82731	13.1332	14.0529	11.0967	9.23	3.10921	fibrolamellar	present	1	late subadult
LAZ	252	247.2	L. declivis	NMQR 164a	humerus	61	89	65	96	101	80	74	63	48	56	90	106	43	71	91	90	77.5333	19.427	23.47	20.28	21.28	19.11	13.01	9.75	7.17	9.51	12.55	12.56	14.869	5.68337	fibrolamellar	absent	0	late subadult
LAZ	252	247.2	L. declivis	NMQR 164b	radius	61	54	57	77	57	55	57	74	109	80	86	59	90	77	92	86	74	16.9031	9.68	10.42	8.27	6.15	4.26	5.15	5.77	6.23	6.18	8.71	7.082	2.04883	fibrolamellar	absent	0	late subadult
LAZ	252	247.2	L. declivis	NMQR 164c	ulna	61	75	74	59	50	52	112	105	104	67	52	68	–	–	–	–	74	22.7124	10.84	7.78	10.76	8.36	10.61	6.32	8.08	8.81	13.12	10.59	9.527	1.99342	fibrolamellar	absent	0	late subadult
LAZ	252	247.2	L. declivis	SAM-PK-K8013a	humerus	69	113	74	135	138	138	91	163	160	189	119	136	152	101	96	124	129	30.7218	23.57	31.41	30.78	22.85	36.77	32.7	16.65	21.68	19.64	20.73	25.68	6.68412	fibrolamellar	present	1	late subadult
LAZ	252	247.2	L. declivis	SAM-PK-K8013b	rib	69	105	128	103	107	93	116	82	191	138	107	109	94	79	109	89	110	27.4252	10.9998	5.17436	3.51553	4.93958	7.31294	10.6772	8.06821	7.77275	9.0845	5.88633	7.34	2.48292	fibrolamellar	present	1	late subadult
LAZ	252	247.2	L. declivis	NMQR 3181	humerus	77	104	80	99	86	77	71	109	84	100	111	142	101	130	82	105	99	19.6958	13.32	11.65	16.02	18.28	21.95	25.48	20.61	14.89	13.46	16	17.17	4.37057	fibrolamellar	present	1	late subadult
LAZ	252	247.2	L. declivis	NMQR 1485a	humerus	82	55	59	64	47	85	107	54	93	76	96	110	89	93	124	83	82	22.8275	15.76	18.39	18.75	17.88	15.16	14.3	23.67	21.33	18.32	9.48	17.304	3.92412	fibrolamellar	present	1	adult
LAZ	252	247.2	L. declivis	NMQR 1485b	radius	82	131	87	87	78	82	88	100	70	95	89	73	93	69	95	85	88.1333	15.0564	9.01	8.77	12.7	14.44	14.75	7.57	6.55	4.92	6.86	9.58	9.515	3.38882	fibrolamellar	present	1	adult
LAZ	252	247.2	L. declivis	NMQR 1485c	ulna	82	98	82	74	78	61	79	83	95	53	84	85	98	125	89	78	84.1333	16.7155	4.66	5.77	9.32	5.85	8.53	7.49	5.81	9.61	9.28	8.94	7.526	1.84685	fibrolamellar	present	0.5	adult
LAZ	252	247.2	L. declivis	NMQR 1485d	femur	82	75	120	96	59	41	89	87	95	86	72	69	94	107	101	104	86.3333	20.2825	9.62	8.56	9.6	9.1	9.5	9.52	11.93	17.35	14.47	17.96	11.761	3.55508	fibrolamellar	present	1	adult

## Sheet: Table 2
Max BSL		MaxFactor(%)	Bin size	Split				BSL	Basal Skull Length
L. maccaigi	389	0	10	70					Inferred from limb bones
L. curvatus	246	0
L. murrayi	213	0
L. declivis	226	0
Taxon	TaxonNum	Assemblage Zone	Accession No.	BSL(mm)	%MaxBSL	%MaxBSLBin
L. maccaigi	1	Daptocephalus	NMQR 3658a	102	26.2211	30
L. maccaigi	1	Daptocephalus	SAM-PK-K4	147	37.7892	40
L. maccaigi	1	Daptocephalus	NMQR 3647	151	38.8175	40
L. maccaigi	1	Lystrosaurus	NMQR 3641	160	41.1311	50
L. maccaigi	1	Daptocephalus	BP/1/2241	165	42.4165	50
L. maccaigi	1	Daptocephalus	NMQR 603	174	44.7301	50
L. maccaigi	1	Daptocephalus	NMQR 3646	176.3	45.3213	50
L. maccaigi	1	Daptocephalus	NMQR 796	178.5	45.8869	50
L. maccaigi	1	Daptocephalus	AM 404	185	47.5578	50
L. maccaigi	1	Lystrosaurus	NMQR 3689	186.9	48.0463	50
L. maccaigi	1	Daptocephalus	SAM-PK-K10571a	190	48.8432	50
L. maccaigi	1	Lystrosaurus	NMQR 3648	190	48.8432	50
L. maccaigi	1	Daptocephalus	NMQR 3576	190	48.8432	50
L. maccaigi	1	Daptocephalus	NMQR 692	195	50.1285	60
L. maccaigi	1	Daptocephalus	SAM-PK-K10619	207	53.2134	60
L. maccaigi	1	Daptocephalus	NMQR 3406	215	55.2699	60
L. maccaigi	1	Daptocephalus	BPI MN 136	216	55.527	60
L. maccaigi	1	Daptocephalus	BP/1/879	220	56.5553	60
L. maccaigi	1	Daptocephalus	NMQR 3938	221	56.8123	60
L. maccaigi	1	Daptocephalus	TM 196	225	57.8406	60
L. maccaigi	1	Daptocephalus	BP/1/79	230	59.126	60
L. maccaigi	1	Daptocephalus	BP/1/4052	230	59.126	60
L. maccaigi	1	Daptocephalus	NMQR 3699	269	69.1517	70
L. maccaigi	1	Daptocephalus	BPI MN 380	270	69.4087	70
L. maccaigi	1	Daptocephalus	SAM-PK-K116	275	70.6941	80
L. maccaigi	1	Daptocephalus	BP/1/3972	300	77.1208	80
L. maccaigi	1	Daptocephalus	BP/1/404	310	79.6915	80
L. maccaigi	1	Daptocephalus	NMQR 1020	314	80.7198	90
L. maccaigi	1	Daptocephalus	AM 4040	315	80.9769	90
L. maccaigi	1	Daptocephalus	NMQR 3663	319	82.0051	90
L. maccaigi	1	Daptocephalus	SAM-PK-K9958	345	88.6889	90
L. maccaigi	1	Daptocephalus	BP/1/4038	389	100	100
L. curvatus	2	unknown	NMQR 614	65.52	26.6341	30
L. curvatus	2	Daptocephalus	NMQR 3642	70.4	28.6179	30
L. curvatus	2	Lystrosaurus	NMQR 4001	74.5	30.2846	40
L. curvatus	2	Daptocephalus	SAM-PK-1362	80	32.5203	40
L. curvatus	2	Daptocephalus	BPI MN 413	81	32.9268	40
L. curvatus	2	Lystrosaurus	NMQR 3914	81.23	33.0203	40
L. curvatus	2	Daptocephalus	BP/1/4643	91	36.9919	40
L. curvatus	2	Daptocephalus	TM 213	98	39.8374	40
L. curvatus	2	Daptocephalus	BP/1/1269	102	41.4634	50
L. curvatus	2	Daptocephalus	SAM-PK_K10378	111.79	45.4431	50
L. curvatus	2	Daptocephalus	TM 191	115	46.748	50
L. curvatus	2	Daptocephalus	NMQR 4058	117	47.561	50
L. curvatus	2	Daptocephalus	BP/1/1746	119	48.374	50
L. curvatus	2	Daptocephalus	IVPP V8532	119.42	48.5447	50
L. curvatus	2	Daptocephalus	SAM-PK-641	120	48.7805	50
L. curvatus	2	Daptocephalus	TM 156	128	52.0325	60
L. curvatus	2	Daptocephalus	TM 16	130	52.8455	60
L. curvatus	2	Daptocephalus	SAM-PK-K3	134	54.4715	60
L. curvatus	2	Daptocephalus	TM 17	142	57.7236	60
L. curvatus	2	Daptocephalus	UMZC T788	146.8	59.6748	60
L. curvatus	2	Daptocephalus	NMQR 3948	153.5	62.3984	70
L. curvatus	2	Daptocephalus	NMQR 3651a	174	70.7317	80
L. curvatus	2	Daptocephalus	BPI MN 110	180	73.1707	80
L. curvatus	2	Daptocephalus	NMQR 3922	184	74.7967	80
L. curvatus	2	Daptocephalus	NMQR 3595	185.5	75.4065	80
L. curvatus	2	Daptocephalus	SAM-PK-7843	188	76.4228	80
L. curvatus	2	Daptocephalus	BMNH 3597	197	80.0813	90
L. curvatus	2	Daptocephalus	BP/1/464	206	82	90
L. curvatus	2	Daptocephalus	SAM-PK-706	218	88.6179	90
L. curvatus	2	Daptocephalus	BP/1/3976	228	92.6829	100
L. curvatus	2	Daptocephalus	BP/1/4048	246	100	100
L. murrayi	3	Lystrosaurus	NMQR 3636	33.16	15.5681	20
L. murrayi	3	Lystrosaurus	NMQR 3655	36.29	17.0376	20
L. murrayi	3	Lystrosaurus	BP/1/3904	41	19.2488	20
L. murrayi	3	Lystrosaurus	BP/1/4011	41.81	19.6291	20
L. murrayi	3	Lystrosaurus	NMQR 3915	43.5	20.4225	30
L. murrayi	3	Lystrosaurus	NMQR 3635a	46.33	21.7512	30
L. murrayi	3	Lystrosaurus	SAM-PK-3531	49	23.0047	30
L. murrayi	3	Lystrosaurus	BP/1/4190	53	24.8826	30
L. murrayi	3	Lystrosaurus	NMQR 351	62.58	29.3803	30
L. murrayi	3	Lystrosaurus	NMQR 3629	65.4	30.7042	40
L. murrayi	3	Lystrosaurus	NMQR 3571	72.39	33.9859	40
L. murrayi	3	Lystrosaurus	NMQR 676	76.13	35.7418	40
L. murrayi	3	Lystrosaurus	SAM-PK-K1362	78	36.6197	40
L. murrayi	3	Lystrosaurus	NMQR 721a	79.84	37.4836	40
L. murrayi	3	Lystrosaurus	BP/1/4030	81.73	38.3709	40
L. murrayi	3	Lystrosaurus	NMQR 4028a	82.16	38.5728	40
L. murrayi	3	Lystrosaurus	NMQR 758	82.74	38.8451	40
L. murrayi	3	Lystrosaurus	BMNH 36253	83	38.9671	40
L. murrayi	3	Lystrosaurus	NMQR 3927	85.4	40.0939	50
L. murrayi	3	Lystrosaurus	NMQR 4055	86	40.3756	50
L. murrayi	3	Lystrosaurus	TM 115	87	40.8451	50
L. murrayi	3	Lystrosaurus	NMQR 6	91.44	42.9296	50
L. murrayi	3	Lystrosaurus	NMQR 29	91.6	43.0047	50
L. murrayi	3	Lystrosaurus	SAM-PK-K8311	92	43.1925	50
L. murrayi	3	Lystrosaurus	BP/1/4344	94.11	44.1831	50
L. murrayi	3	Lystrosaurus	SAM-PK-11186	95	44.6009	50
L. murrayi	3	Lystrosaurus	SAM-PK-K1397	95	44.6009	50
L. murrayi	3	Lystrosaurus	BP/1/3900	96	45.0704	50
L. murrayi	3	Lystrosaurus	NMQR 799	96.1	45.1174	50
L. murrayi	3	Lystrosaurus	SAM-PK-11169	98	46.0094	50
L. murrayi	3	Lystrosaurus	NMQR 3581	99.92	46.9108	50
L. murrayi	3	Lystrosaurus	BP/1/4798	101	47.4178	50
L. murrayi	3	Lystrosaurus	BMNH 36224	100	46.9484	50
L. murrayi	3	Lystrosaurus	BP/1/5086a	101	47.4178	50
L. murrayi	3	Lystrosaurus	BMNH R5710	101	47.4178	50
L. murrayi	3	Lystrosaurus	NMQR 3957	101.54	47.6714	50
L. murrayi	3	Lystrosaurus	BP/1/4217	101.63	47.7136	50
L. murrayi	3	Lystrosaurus	TM 67	102	47.8873	50
L. murrayi	3	Lystrosaurus	NMQR 3592	102.88	48.3005	50
L. murrayi	3	Lystrosaurus	BP/1/4039	103	48.3568	50
L. murrayi	3	Lystrosaurus	UMCZ T763	103	48.3568	50
L. murrayi	3	Lystrosaurus	NMQR 37	103.31	48.5023	50
L. murrayi	3	Lystrosaurus	NMQR 815a	104.77	49.1878	50
L. murrayi	3	Lystrosaurus	NMQR 4038	104.96	49.277	50
L. murrayi	3	Lystrosaurus	SAM-PK-K1165	105	49.2958	50
L. murrayi	3	Lystrosaurus	NMQR 4059	105	49.2958	50
L. murrayi	3	Lystrosaurus	NMQR 2951	105.96	49.7465	50
L. murrayi	3	Lystrosaurus	NMQR 4056	106	49.7653	50
L. murrayi	3	Lystrosaurus	TM 69	106	49.7653	50
L. murrayi	3	Lystrosaurus	NMQR 3593	106.69	50.0892	60
L. murrayi	3	Lystrosaurus	NMQR 3609	107.59	50.5117	60
L. murrayi	3	Lystrosaurus	SAM-PK-K7991	108	50.7042	60
L. murrayi	3	Lystrosaurus	SAM-PK-K10461	108.39	50.8873	60
L. murrayi	3	Lystrosaurus	BP/1/4271	108.4	50.892	60
L. murrayi	3	Lystrosaurus	SAM-PK-K10686	109.23	51.2817	60
L. murrayi	3	Lystrosaurus	NMQR 3765	109.41	51.3662	60
L. murrayi	3	Lystrosaurus	BPI MN106	110	51.6432	60
L. murrayi	3	Lystrosaurus	BP/1/269	110.65	51.9484	60
L. murrayi	3	Lystrosaurus	BP/1/4705	110.98	52.1033	60
L. murrayi	3	Lystrosaurus	NMQR 4057	111	52.1127	60
L. murrayi	3	Lystrosaurus	BP/1/468	112	52.5822	60
L. murrayi	3	Lystrosaurus	SAM-PK-K10383	112.59	52.8592	60
L. murrayi	3	Lystrosaurus	NMQR 3649	113	53.0516	60
L. murrayi	3	Lystrosaurus	NMQR 596	113.43	53.2535	60
L. murrayi	3	Lystrosaurus	SAM-PK-K10466	113.53	53.3005	60
L. murrayi	3	Lystrosaurus	FMNH UC1516	113.75	53.4038	60
L. murrayi	3	Lystrosaurus	SAM-PK-K1495	115	53.9906	60
L. murrayi	3	Lystrosaurus	NMQR 648	115.38	54.169	60
L. murrayi	3	Lystrosaurus	TM 71	116	54.4601	60
L. murrayi	3	Lystrosaurus	BP/1/266	118.4	55.5869	60
L. murrayi	3	Lystrosaurus	NMQR 725	118.8	55.7746	60
L. murrayi	3	Lystrosaurus	NMQR 5	119.73	56.2113	60
L. murrayi	3	Lystrosaurus	NMQR 3040	121.53	57.0563	60
L. murrayi	3	Lystrosaurus	NMQR 3840a	122.09	57.3192	60
L. murrayi	3	Lystrosaurus	BP/1/3978	123	57.7465	60
L. murrayi	3	Lystrosaurus	BP/1/4710	126	59.1549	60
L. murrayi	3	Lystrosaurus	TM 33	127	59.6244	60
L. murrayi	3	Lystrosaurus	NMQR 393	127.83	60.0141	70
L. murrayi	3	Lystrosaurus	NMQR 3539b	128.07	60.1268	70
L. murrayi	3	Lystrosaurus	NMQR 2065	129.08	60.6009	70
L. murrayi	3	Lystrosaurus	NMQR 3960	130	61.0329	70
L. murrayi	3	Lystrosaurus	SAM-PK-K1247	131.03	61.5164	70
L. murrayi	3	Lystrosaurus	BP/1/5070	134	62.9108	70
L. murrayi	3	Lystrosaurus	NMQR 657	134.38	63.0892	70
L. murrayi	3	Lystrosaurus	NMQR 3539a	138.38	64.9671	70
L. murrayi	3	Lystrosaurus	NMQR 835a	141.48	66.4225	70
L. murrayi	3	Lystrosaurus	SAM-PK-K7	142	66.6667	70
L. murrayi	3	Lystrosaurus	TM 2881	144	67.6056	70
L. murrayi	3	Lystrosaurus	NMQR 3963	145	68.0751	70
L. murrayi	3	Lystrosaurus	SAM-PK-K8	146	68.5446	70
L. murrayi	3	Lystrosaurus	SAM-PK-11181	146	68.5446	70
L. murrayi	3	Lystrosaurus	NMQR 3565	150.6	70.7042	80
L. murrayi	3	Lystrosaurus	BMNH 1291	159	74.6479	80
L. murrayi	3	Lystrosaurus	MHMUK PVR1291	160	75.1174	80
L. murrayi	3	Lystrosaurus	NMQR 3540	171.64	80.5822	90
L. murrayi	3	Lystrosaurus	YPM 2225	200	93.8967	100
L. murrayi	3	Lystrosaurus	BP/1/3236	213	100	100
L. declivis	4	Lystrosaurus	NMQR 129	59.44	26.3009	30
L. declivis	4	Lystrosaurus	NMQR 624	60.52	26.7788	30
L. declivis	4	Lystrosaurus	NMQR 159	68	30.0885	40
L. declivis	4	Lystrosaurus	NMQR 738	72.4	32.0354	40
L. declivis	4	Lystrosaurus	NMQR 4039	74.05	32.7655	40
L. declivis	4	Lystrosaurus	NMQR 158	80	35.3982	40
L. declivis	4	Lystrosaurus	NMQR 4043	80.01	35.4027	40
L. declivis	4	Lystrosaurus	NMQR 128	80.92	35.8053	40
L. declivis	4	Lystrosaurus	NMQR 3999	83	36.7257	40
L. declivis	4	Lystrosaurus	NMQR 3737	84.21	37.2611	40
L. declivis	4	Lystrosaurus	BP/1/1706	86.45	38.2522	40
L. declivis	4	Lystrosaurus	NMQR 721b	88.84	39.3097	40
L. declivis	4	Lystrosaurus	NMQR 640	90.72	40.1416	50
L. declivis	4	Lystrosaurus	BP/1/3908	91	40.2655	50
L. declivis	4	Lystrosaurus	NMQR 47	92.32	40.8496	50
L. declivis	4	Lystrosaurus	NMQR 395	93.66	41.4425	50
L. declivis	4	Lystrosaurus	BP/1/4275	95	42.0354	50
L. declivis	4	Lystrosaurus	NMQR 660	95.53	42.2699	50
L. declivis	4	Lystrosaurus	TM 4113	96	42.4779	50
L. declivis	4	Lystrosaurus	NMQR 1655	97.49	43.1372	50
L. declivis	4	Lystrosaurus	NMQR 787	98.18	43.4425	50
L. declivis	4	Lystrosaurus	NMQR 423	98.49	43.5796	50
L. declivis	4	Lystrosaurus	NMQR 3959a	99	43.8053	50
L. declivis	4	Lystrosaurus	TM 4050	99.19	43.8894	50
L. declivis	4	Lystrosaurus	NMQR 818	99.49	44.0221	50
L. declivis	4	Lystrosaurus	TM 117	101	44.6903	50
L. declivis	4	Lystrosaurus	NMQR 42	101.26	44.8053	50
L. declivis	4	Lystrosaurus	NMQR 1	101.36	44.8496	50
L. declivis	4	Lystrosaurus	NMQR 664	102.2	45.2212	50
L. declivis	4	Lystrosaurus	NMQR 3837	102.72	45.4513	50
L. declivis	4	Lystrosaurus	NMQR 372	102.74	45.4602	50
L. declivis	4	Lystrosaurus	NMQR 3560	103.05	45.5973	50
L. declivis	4	Lystrosaurus	BP/1/4507	103.93	45.9867	50
L. declivis	4	Lystrosaurus	BP/1/4314	104.6	46.2832	50
L. declivis	4	Lystrosaurus	NMQR 388	104.73	46.3407	50
L. declivis	4	Lystrosaurus	TM 4049	105	46.4602	50
L. declivis	4	Lystrosaurus	NMQR 32	105.37	46.6239	50
L. declivis	4	Lystrosaurus	BP/1/4343	105.51	46.6858	50
L. declivis	4	Lystrosaurus	NMQR 1382	105.89	46.854	50
L. declivis	4	Lystrosaurus	SAM-PK-K10454	105.97	46.8894	50
L. declivis	4	Lystrosaurus	TM 164	106	46.9027	50
L. declivis	4	Lystrosaurus	NMQR 618a	106.73	47.2257	50
L. declivis	4	Lystrosaurus	BP/1/3915	108.55	48.031	50
L. declivis	4	Lystrosaurus	NMQR 116	109.93	48.6416	50
L. declivis	4	Lystrosaurus	BP/1/1368	110	48.6726	50
L. declivis	4	Lystrosaurus	NMQR 3738	111.53	49.3496	50
L. declivis	4	Lystrosaurus	NMQR 3759	111.88	49.5044	50
L. declivis	4	Lystrosaurus	NMQR 3301	111.95	49.5354	50
L. declivis	4	Lystrosaurus	TM 139	113	50	50
L. declivis	4	Lystrosaurus	NMQR 12	113.12	50.0531	60
L. declivis	4	Lystrosaurus	BP/1/5086b	114	50.4425	60
L. declivis	4	Lystrosaurus	NMQR 618b	114.94	50.8584	60
L. declivis	4	Lystrosaurus	BP/1/1750	115.17	50.9602	60
L. declivis	4	Lystrosaurus	NMQR 3239	115.73	51.208	60
L. declivis	4	Lystrosaurus	BP/1/4211a	115.95	51.3053	60
L. declivis	4	Lystrosaurus	NMQR 679	117.7	52.0796	60
L. declivis	4	Lystrosaurus	FMNH UR2506	118.85	52.5885	60
L. declivis	4	Lystrosaurus	NMQR 815b	118.94	52.6283	60
L. declivis	4	Lystrosaurus	NMQR 3573	120.04	53.115	60
L. declivis	4	Lystrosaurus	NMQR 161	120.17	53.1726	60
L. declivis	4	Lystrosaurus	NMQR 365	120.48	53.3097	60
L. declivis	4	Lystrosaurus	SAM-PK-3596	121	53.5398	60
L. declivis	4	Lystrosaurus	SAM-PK-K4800	124	54.8673	60
L. declivis	4	Lystrosaurus	NMQR 132	124.64	55.1504	60
L. declivis	4	Lystrosaurus	NMQR 675	125.75	55.6416	60
L. declivis	4	Lystrosaurus	BMNH 47324	126	55.7522	60
L. declivis	4	Lystrosaurus	NMQR 3917	127.48	56.4071	60
L. declivis	4	Lystrosaurus	NMQR 4028b	130.84	57.8938	60
L. declivis	4	Lystrosaurus	NMQR 3929	132	58.4071	60
L. declivis	4	Lystrosaurus	NMQR 735	133.76	59.1858	60
L. declivis	4	Lystrosaurus	SAM-PK-3455	134	59.292	60
L. declivis	4	Lystrosaurus	SAM-PK-K1398	135	59.7345	60
L. declivis	4	Lystrosaurus	NMQR 3575	135.86	60.115	70
L. declivis	4	Lystrosaurus	BSP 1934-VIII-511	135.86	60.115	70
L. declivis	4	Lystrosaurus	TM 20	136	60.177	70
L. declivis	4	Lystrosaurus	NMQR 126	136.8	60.531	70
L. declivis	4	Lystrosaurus	SAM-PK-11184a	138	61.0619	70
L. declivis	4	Lystrosaurus	NMQR 164	138.33	61.208	70
L. declivis	4	Lystrosaurus	BP/1/1379	140.81	62.3053	70
L. declivis	4	Lystrosaurus	BPI MN109	141	62.3894	70
L. declivis	4	Lystrosaurus	BMNH 36221	142.45	63.031	70
L. declivis	4	Lystrosaurus	BMNH 36222	143	63.2743	70
L. declivis	4	Lystrosaurus	TM 4465	144	63.7168	70
L. declivis	4	Lystrosaurus	BP/1/479	144.67	64.0133	70
L. declivis	4	Lystrosaurus	BP/1/477	145.94	64.5752	70
L. declivis	4	Lystrosaurus	BP/1/267	146.3	64.7345	70
L. declivis	4	Lystrosaurus	BP/1/4624	148	65.4867	70
L. declivis	4	Lystrosaurus	SAM-PK-K1378	151.1	66.8584	70
L. declivis	4	Lystrosaurus	SAM-PK-K12	151.12	66.8673	70
L. declivis	4	Lystrosaurus	NMQR 356	153.56	67.9469	70
L. declivis	4	Lystrosaurus	SAM-PK-K8013	155	68.5841	70
L. declivis	4	Lystrosaurus	NMQR 424	161.29	71.3673	80
L. declivis	4	Lystrosaurus	TM 21	173	76.5487	80
L. declivis	4	Lystrosaurus	NMQR 3181	173	76.5487	80
L. declivis	4	Lystrosaurus	TM 3580	185	81.8584	90
L. declivis	4	Lystrosaurus	NMQR 1485	185	81.8584	90
L. declivis	4	Lystrosaurus	BP/1/1754	195.71	86.5973	90
L. declivis	4	Lystrosaurus	SAM-PK-3593	203	89.823	90
L. declivis	4	Lystrosaurus	NMQR 4027	226	100	100
